# Supplementary material for: Imbalance in amino acid and purine metabolisms at the hypothalamus in inflammation-associated depression by GC-MS
Source: Royal Society of Chemistry journal article supplement (doi:10.1039/c7mb00494j), 2017-10-25
Supplement: c7mb00494j1.zip [file c7mb00494j1.zip]

Supplementary document: The detectable metabolites by GC-MS in the hypothalamus of LPS-induced depression mouse.
